# Supplementary material for: FAM20C directly binds to and phosphorylates Periostin
Source: PubMed Central journal article supplement (PMC7555550; doi:10.1038/s41598-020-74400-6), 2020-10-13

## **Supplementary Information**

### **FAM20C directly binds to and phosphorylates Periostin**

Ju-Hsien Lin, I-Ping, Lin, Yoshio Ohyama, Hanna Mochida, Akira Kudo, Masaru Kaku, and  
Yoshiyuki Mochida

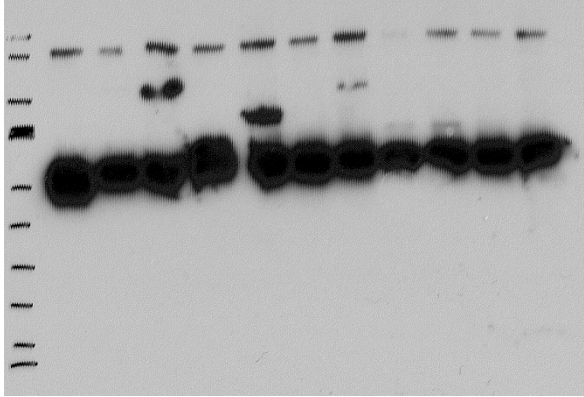

1 min exposure

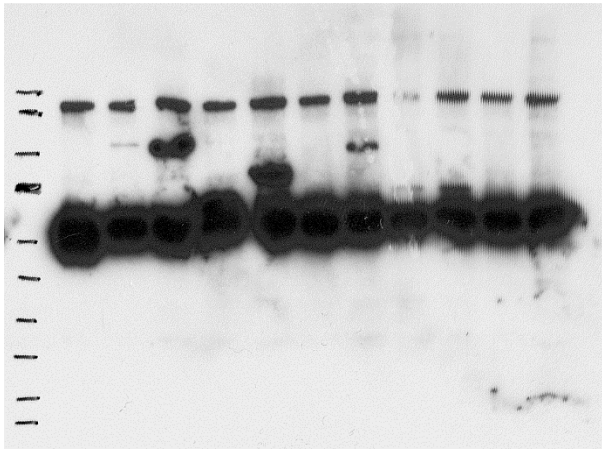

3 min exposure

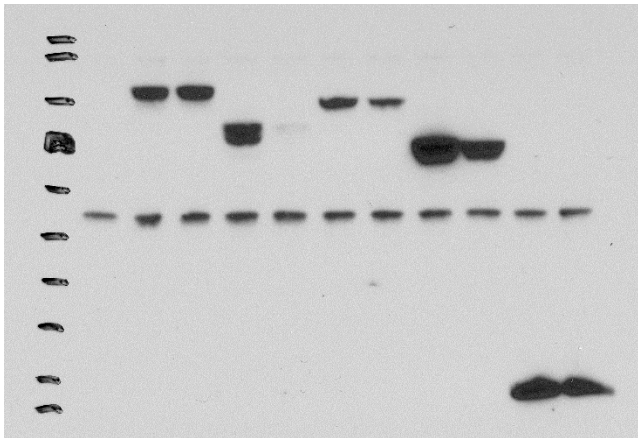

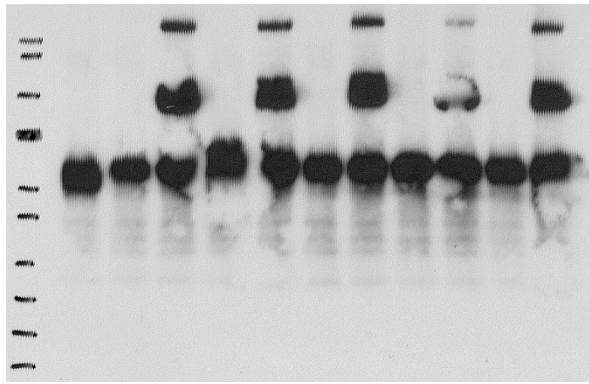

Supplement: 41598_2020_74400_MOESM1_ESM.pdf [file 41598_2020_74400_MOESM1_ESM.pdf]
